# Supplementary material for: Mallet Finger Lattice Casts Using 3D Printing
Source: Hindawi journal article supplement (doi:10.1155/2019/4765043), 2019-07-01
Supplement: f1 [file 4765043.f1.pdf]

## Supplementary Materials

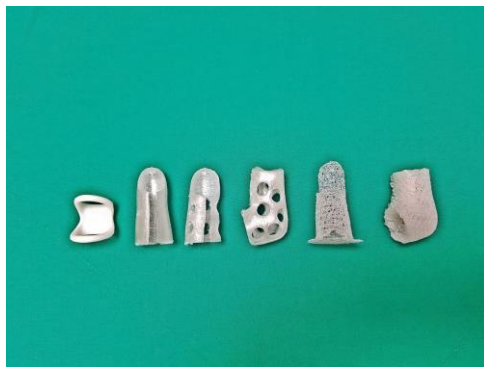

Figure S1: Various types of 3D-printed finger casts.
